# Supplementary material
Source: publisher figshare collection journal article supplement (https://acs.figshare.com/ndownloader/files/5191360)
Supplement: Supplementary file 1 [file 5191360]

## **Supplementary Material**

# **Sensitization of TiO<sub>2</sub> Films by Supramolecular Species Containing Zinc-Porphyrins and Ruthenium Polypyridyl Complexes**

Ana F. Nogueira, Luis Fernando O. Furtado, André Luiz B. Formiga, Marcelo  
Nakamura, Koiti Araki and Henrique E. Toma<sup>\*</sup>

*Instituto de Química - Universidade de São Paulo. C. P. 26077, CEP 05513-970,  
São Paulo – Brazil*

### **Contents:**

#### **Experimental Section**

- 1.1. Materials**
- 1.2. Preparation of nanoporous TiO<sub>2</sub> films**
- 1.3. Surface treatment with the dye**
- 1.4. Assembling the cell**
- 1.5. Measurement of the photoelectrochemical properties**
- 1.6. Electronic and emission spectra**
- 1.7. Electrochemical Studies**
- 1.8. Theoretical Calculations**
- 1.9. Scanning Force Microscopy**

#### **References**

## Experimental Section

### 1.1. Materials

The synthesis and characterization of TRuphenTPyP, TRubipyTPyP and TRubipyZnTPyP supramolecules were detailed in references.<sup>1-3</sup> The TRuphenZnTPyP derivative was obtained by the reaction of the free base species with zinc acetate in methanol. All the counter ions in the supramolecules are TFMS (trifluoromethane sulphonate). Analysis for C<sub>140</sub>H<sub>100</sub>N<sub>24</sub>Ru<sub>4</sub>O<sub>18</sub>S<sub>4</sub>F<sub>12</sub>Cl<sub>4</sub>Zn, exp. (calc.): C = 49,6 (49,8); N = 10.1 (9,9); H = 3,3 (3,0). The TiO<sub>2</sub> powder (P25) was kindly donated by Degussa AG, Frankfurt/M. All others reagent grade chemicals were used without further purification.

### 1.2. Preparation of nanoporous TiO<sub>2</sub> films

The nanoporous TiO<sub>2</sub> film deposited onto a sheet of F-doped SnO<sub>2</sub> TEC15 conducting glass (sheet resistance  $\sim 15 \Omega/\text{cm}^2$ ) was prepared using a variation of a previously published procedure.<sup>4</sup> A colloidal TiO<sub>2</sub> suspension was obtained by grinding 6 g of TiO<sub>2</sub> powder in 2 mL of distilled H<sub>2</sub>O and 0.2 mL of acetylacetone, in a mortar with a pestle, for about 40 min. Finally 8.0 mL of distilled water and 0.1 mL of Triton X-100 were slowly added with continuous mixing for 10 min.

A previously cleaned conductive glass sheet was laid to a flat surface with the conductive side up and the deposition area was delimited with a plastic adhesive tape. Several drops of the above TiO<sub>2</sub> suspension were spread as evenly possible onto the surface using a glass rod. The thickness of the TiO<sub>2</sub> coating ( $\sim 4\mu\text{m}$ ) was determined by the thickness of the adhesive tape. The electrodes were then dried in air and fired in a furnace, at 450 °C for 30 min.

### 1.3. Surface treatment with the dye

The electrodes covered by a nanoporous TiO<sub>2</sub> film layer were immersed during 48h in a  $1.0 \times 10^{-4}$  M solution of the TRuphenZnTPyP species in different solvents to achieve the adsorption equilibrium condition. We prepared solutions in ethanol, ethanol/acetonitrile (2:1) and 2,2,2-trifluoroethanol. The surface coverage was roughly estimated by the optical density of the film and color change from white to the color of the attached dye. Afterwards, the electrode was washed with the solvent and dried in moisture-free air.

#### **1.4. Assembling the cell**

The cell ( $1.0\text{ cm}^2$  active area) was assembled by transferring about 1 mL of the electrolyte solution (0.5M t-butylpyridine, 0.6M tetrabutyl ammonium iodide, 0.1M LiI, 0.1M  $\text{I}_2$  in 10 mL methoxypropionitrile) onto the  $\text{SnO}_2\text{:F}^-$  glass covered with  $\text{TiO}_2$ /attached dye. The counter electrode was then pressed against the  $\text{TiO}_2$ /dye film. The transparent counter electrode was treated by transferring a drop of  $0.05\text{ mol L}^{-1}$  solution of  $\text{H}_2\text{PtCl}_6$  in isopropanol onto the conducting glass and firing at  $400\text{ }^\circ\text{C}$  in air for 20 min. A PVC film was placed in between the two electrodes to avoid short circuit and electrolyte leakage. The assembly was kept together by a clamp. No further sealing was necessary, at least for the tests described in this communication.

#### **1.5. Measurement of the photoelectrochemical properties**

The photoelectrochemical cells (DSSC) were firmly placed in an optical bench for the characterization procedures. The IPCE spectra and the current-voltage ( $I$ - $V$ ) curve were obtained using an Applied Photophysics 150 W Xenon lamp as a white-light source and a home-made resistor as a variable load. Oriel Spectral Luminator was employed as monochromatic source. The light intensity was varied from 1 to  $2\text{ mW cm}^{-2}$ . Measurements of photocurrent and photovoltage were performed using a Keithley 610C electrometer or a calibrated multimeter. The sample was always illuminated through the conducting glass substrate and no corrections were made for the 30 % reflection and transmission losses in the  $\text{SnO}_2\text{:F}$  glass. The poly and monochromatic light intensity at the electrode position were measured with a Newport Optical Power Meter model 1830-C.

#### **1.6. Electronic and emission spectra**

The UV-vis spectra were obtained in a HP-8453A diode array spectrophotometer in ethanol solution. The emission spectra were recorded on a Photon Technology Inc. model LS100 spectrofluorimeter in  $\text{N}_2$  gas saturated ethanol solution.

#### **1.7. Electrochemical Studies**

The electrochemistry was carried out in [(C<sub>2</sub>H<sub>5</sub>)<sub>4</sub>N]ClO<sub>4</sub> 0.1 M acetonitrile solution using a potentiostat/galvanostat from Ecochemie, model AUTOLAB PGSTAT30. A conventional three electrode cell consisting of a platinum disk working electrode, Ag|Ag<sup>+</sup> 0.010 M in acetonitrile ( $E^0 = 0.503$  V *vs* NHE) reference electrode and a coiled platinum wire as counter electrode was used.

### 1.8. Theoretical Calculations

Molecular modeling calculations were carried out for the TRuphenZnTPyP species, starting with the MM<sup>+</sup> module, a modified MM2 force field<sup>5</sup> for geometry optimization, within the HyperChem<sup>TM</sup> program<sup>6</sup>, and using a gradient of  $1 \times 10^{-5}$  kcal Å<sup>-1</sup> mol<sup>-1</sup> as a convergence criterion in a conjugated gradient method. SCF molecular orbital calculations were performed at the RHF level, using the ZINDO/S method<sup>7</sup>, and the default parameters (and scaling factors  $k_{p\sigma} = 1.267$  and  $k_{p\pi} = 0.585$ ). Geometry optimization was refined again, using the atomic charge distribution from the semi-empirical calculations, and the procedure repeated many times, until reaching convergence. The electronic spectrum was calculated, based on single CI excitations in an active space involving 23 frontier molecular orbitals (15 highest occupied and 8 lowest unoccupied MOs). The relevant HOMO and LUMO levels and the fractional orbital mixture are shown in Table 1 while the theoretical and experimental electronic spectra were collected in Table 2.

### 1.9. Scanning Force Microscopy

For MAC Mode measurements was used PicoSPM I (Molecular Imaging) with MAClever Type II ( $k \sim 2,8$  N/m,  $f \sim 60$  kHz) operating with Amplitude Setpoint 5.55 V under ambient conditions. The MAC Mode images were obtained with scan rate at 3 Hz and 512 points per line.

**Table 1.** Molecular orbital energy order and fractional orbital mixing (%) of TRuphenZnTPyP.

| Mol. Orbital      | Energy / eV   | Ru <sup>II</sup> | Phen        | Cl <sup>-</sup> | pyridyl      | Porphyrin    | Zn <sup>II</sup> | Water       |
|-------------------|---------------|------------------|-------------|-----------------|--------------|--------------|------------------|-------------|
| 421               | -6.47         | 4.89             | 91.69       | 0.16            | 2.88         | 0.38         | 0.00             | 0.00        |
| 420               | -6.47         | 4.64             | 91.69       | 0.16            | 2.74         | 0.77         | 0.00             | 0.00        |
| 419               | -6.48         | 2.29             | 96.19       | 0.06            | 1.23         | 0.23         | 0.00             | 0.00        |
| 418               | -6.49         | 2.89             | 92.09       | 0.10            | 3.51         | 1.41         | 0.00             | 0.00        |
| 417               | -6.50         | 2.20             | 95.03       | 0.05            | 2.14         | 0.58         | 0.00             | 0.00        |
| 416               | -6.52         | 0.60             | 81.91       | 0.02            | 12.36        | 5.11         | 0.00             | 0.00        |
| <b>415</b>        | <b>-7.50</b>  | <b>0.82</b>      | <b>0.47</b> | <b>0.02</b>     | <b>10.32</b> | <b>88.35</b> | <b>0.00</b>      | <b>0.03</b> |
| <b>414 (LUMO)</b> | <b>-7.50</b>  | <b>0.89</b>      | <b>0.52</b> | <b>0.02</b>     | <b>10.99</b> | <b>87.54</b> | <b>0.00</b>      | <b>0.03</b> |
| <b>413 (HOMO)</b> | <b>-12.00</b> | <b>38.36</b>     | <b>8.14</b> | <b>1.20</b>     | <b>11.60</b> | <b>40.48</b> | <b>0.02</b>      | <b>0.20</b> |
| 412               | -12.20        | 65.80            | 25.07       | 3.68            | 5.03         | 0.42         | 0.00             | 0.00        |
| 411               | -12.30        | 65.58            | 25.09       | 3.66            | 4.96         | 0.72         | 0.00             | 0.00        |
| 410               | -12.30        | 65.72            | 25.22       | 3.67            | 4.94         | 0.45         | 0.00             | 0.00        |
| 409               | -12.30        | 59.76            | 28.74       | 2.16            | 2.89         | 6.41         | 0.00             | 0.03        |
| 408               | -12.40        | 70.03            | 20.20       | 1.36            | 7.72         | 0.70         | 0.00             | 0.00        |
| 407               | -12.40        | 69.91            | 20.18       | 1.38            | 7.59         | 0.94         | 0.00             | 0.00        |
| 406               | -12.40        | 70.06            | 20.02       | 1.30            | 7.81         | 0.80         | 0.00             | 0.00        |
| 405               | -12.50        | 71.13            | 21.61       | 5.27            | 1.58         | 0.40         | 0.00             | 0.00        |
| 404               | -12.50        | 71.10            | 21.73       | 4.97            | 2.03         | 0.17         | 0.00             | 0.00        |
| 403               | -12.50        | 71.13            | 21.71       | 5.47            | 1.25         | 0.44         | 0.00             | 0.00        |
| 402               | -12.50        | 70.89            | 21.79       | 4.84            | 2.23         | 0.25         | 0.00             | 0.00        |
| <b>401</b>        | <b>-12.60</b> | <b>0.28</b>      | <b>0.09</b> | <b>0.01</b>     | <b>1.45</b>  | <b>98.17</b> | <b>0.00</b>      | <b>0.00</b> |
| <b>400</b>        | <b>-12.70</b> | <b>38.82</b>     | <b>9.02</b> | <b>0.41</b>     | <b>10.93</b> | <b>40.59</b> | <b>0.01</b>      | <b>0.21</b> |
| 399               | -13.80        | 6.28             | 91.35       | 1.84            | 0.48         | 0.05         | 0.00             | 0.00        |
| 398               | -13.80        | 6.32             | 91.30       | 1.86            | 0.47         | 0.05         | 0.00             | 0.00        |
| 397               | -13.80        | 6.31             | 91.34       | 1.83            | 0.47         | 0.05         | 0.00             | 0.00        |

**Table 2.** Selected theoretical electronic transitions of TRuphenZnTPyP.

| Observed<br>Band | Theoretical<br>$\lambda$ / nm | Assignment<br>$MO_i \rightarrow MO_f$           |                                              |
|------------------|-------------------------------|-------------------------------------------------|----------------------------------------------|
| 606, 563         | 623.9                         | 413 $\rightarrow$ 414;<br>401 $\rightarrow$ 415 | Q <sub>(0-0)</sub> , Q <sub>(0-1)</sub> band |
|                  |                               | 413 $\rightarrow$ 415;<br>401 $\rightarrow$ 414 | ibidem                                       |
| 496 sh           | 483.5                         | 402 $\rightarrow$ 420                           | Ru $\rightarrow$ phen CT                     |
|                  | 476.2                         | 403 $\rightarrow$ 421                           | ibidem                                       |
| masked           | 385.4                         | 410 $\rightarrow$ 415                           | Ru $\rightarrow$ porphyrin CT                |
|                  | 384.8                         | 412 $\rightarrow$ 415                           | ibidem                                       |
|                  | 383.8                         | 412 $\rightarrow$ 414;<br>411 $\rightarrow$ 414 | ibidem                                       |
|                  | 382.2                         | 408 $\rightarrow$ 414                           | ibidem                                       |
|                  | 361.4                         | 406 $\rightarrow$ 414                           | ibidem                                       |
| 430              | 339.0                         | 401 $\rightarrow$ 415;<br>400 $\rightarrow$ 414 | Soret band                                   |
|                  |                               | 401 $\rightarrow$ 414;<br>400 $\rightarrow$ 415 | ibidem                                       |

sh = shoulder.

## References

- (1) Araki, K.; Toma, H. E.; *J. Coord. Chem.* **1993**, 30, 9.
- (2) Araki, K.; Toma, H. E.; *J. Photochem. Photobiol. A: Chem.* **1994**, 83, 245.
- (3) Araki, K.; Araujo, A. L.; Toyama, M. M.; Franco, M.; Azevedo, C. M. N.; Agnes, L.; Toma, H. E.; *J. Porphyr. Phtalocyanines.* **1998**, 2, 467.
- (4) Nazeeruddin, M.K.; Kay, A.; Humphry-Baker, R.; Muller, E.; Liska, P.; Vanchopoulos, N.; Gratzel, M.; *J. Am. Chem. Soc.* **1993**, 115, 6382.
- (5) Allinger, N. L.; *J. Am. Chem. Soc.* **1977**, 99, 8127.
- (6) HyperChem<sup>TM</sup> version 6.01 for Windows<sup>TM</sup> (Hypercube Inc. Gainesville, FL, USA, 2000)
- (7) (a) Zerner, M. C.; Loew, G. H.; Kirchner, R. F.; Mueller-Westerhoff, U. T.; *J. Am. Chem. Soc.* **1980**, 102, 589. (b) Bacon, A. D.; Zerner, M. C.; *Theoret. Chim. Acta* **1979**, 53, 21. (c) Ridley, N.

---

L.; Zerner, M. C.; *Theoret. Chim. Acta* **1976**, 42, 223. (d) Ridley, N. L.; Zerner, M. C.; *Theoret. Chim. Acta*, **1973**, 32, 111.
